# Supplementary material for: Erectile Dysfunction Preceding Clinically Diagnosed α-Synucleinopathies: A Case-Control Study in Olmsted County
Source: Hindawi journal article supplement (doi:10.1155/2019/6303945), 2019-04-09
Supplement: f1 [file 6303945.f1.pdf]

\*

Supplementary Table 1-Demographics of Cases

| <b>Type of <math>\alpha</math>-synucleinopathy</b> | <b>Frequency (%)</b> |
|----------------------------------------------------|----------------------|
| Parkinson's disease                                | 185 (66.1%)          |
| Lewy Body Dementia                                 | 56 (20.0%)           |
| Parkinson's Disease-Dementia                       | 27 (9.64%)           |
| Multiple System Atrophy                            | 12 (4.26%)           |
| <b>Race</b>                                        |                      |
| White                                              | 272 (96.5%)          |
| Asian                                              | 7 (2.48%)            |
| Black                                              | 2 (0.71%)            |
| Other/Mixed                                        | 1 (0.36%)            |
